# Supplementary material
Source: publisher figshare collection journal article supplement (https://aacr.figshare.com/articles/dataset/_/23782429)

**Supplementary Figure S15- Individual growth curves of WHIM16 tumors from mice treated with a second cycle of E2 ± olaparib.** Mice bearing WHIM16 tumors that recurred on E2 monotherapy, and then resumed growth during subsequent estrogen deprivation (in Fig. 6D), were randomized to treatment with E2 (1 mg s.c. pellet) ± olaparib (50 mg/kg/d i.p.). Tumor volumes were serially measured. Each line represents one mouse. Summary data are shown in Fig. 6E.

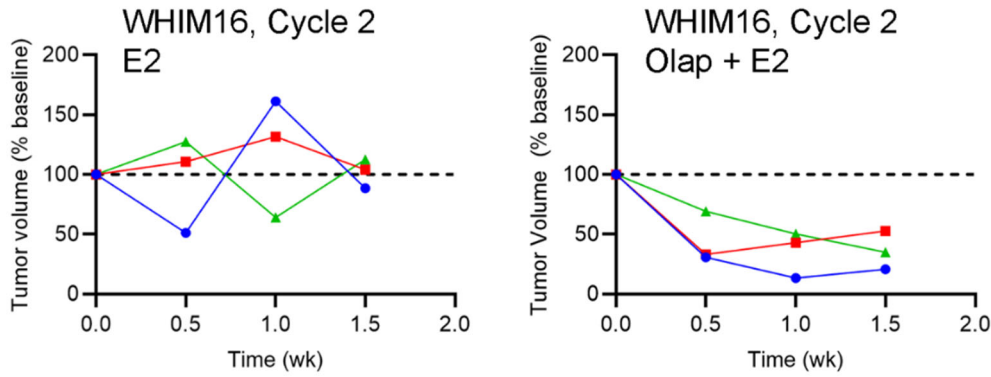

Supplement: Supplementary file 1 [file 41716006]
